# Supplementary material
Source: publisher figshare collection journal article supplement (https://acs.figshare.com/ndownloader/files/4576084)
Supplement: Supplementary file 1 [file 4576084]

## Supporting Information for

**Title:** Formation of Crystalline Polymers from the Reaction of Amine Functionalized C<sub>60</sub> with Silver Salts

**Authors:** Christopher J. Chancellor, Marilyn M. Olmstead, Alan L. Balch

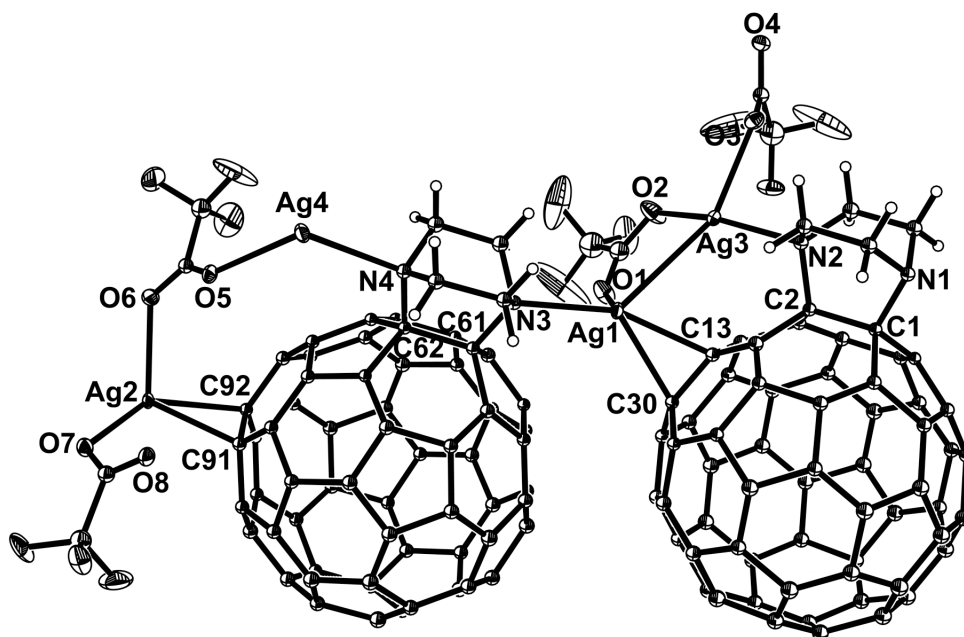

**Figure SI-1.** Structure of  $\{[C_{60}(N(CH_2CH_2)_2N)][Ag(O_2CCF_3)]_2\} \bullet CS_2$  with the asymmetric unit shown. Thermal ellipsoids are shown at 50% probability level. The carbon disulfide molecules were omitted for clarity.

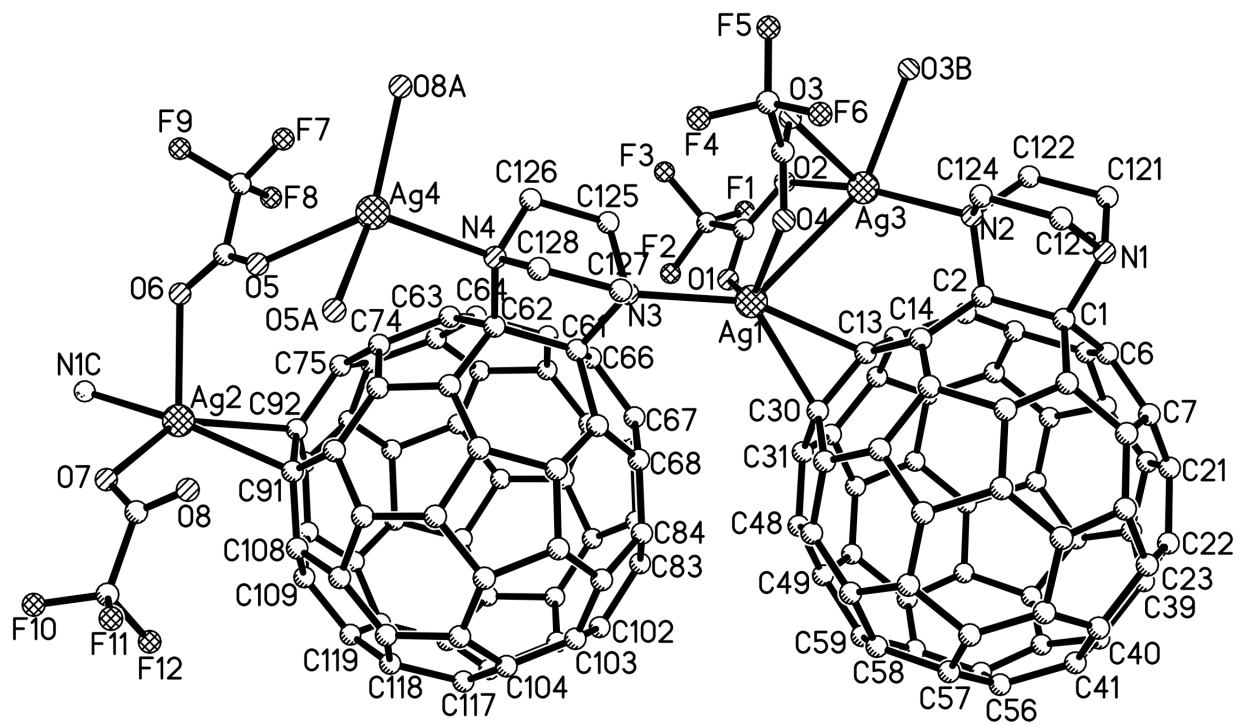

**Figure SI-2.** Numbering for  $\{[C_{60}(N(CH_2CH_2)_2N)][Ag(O_2CCF_3)_2]\} \bullet CS_2$ .

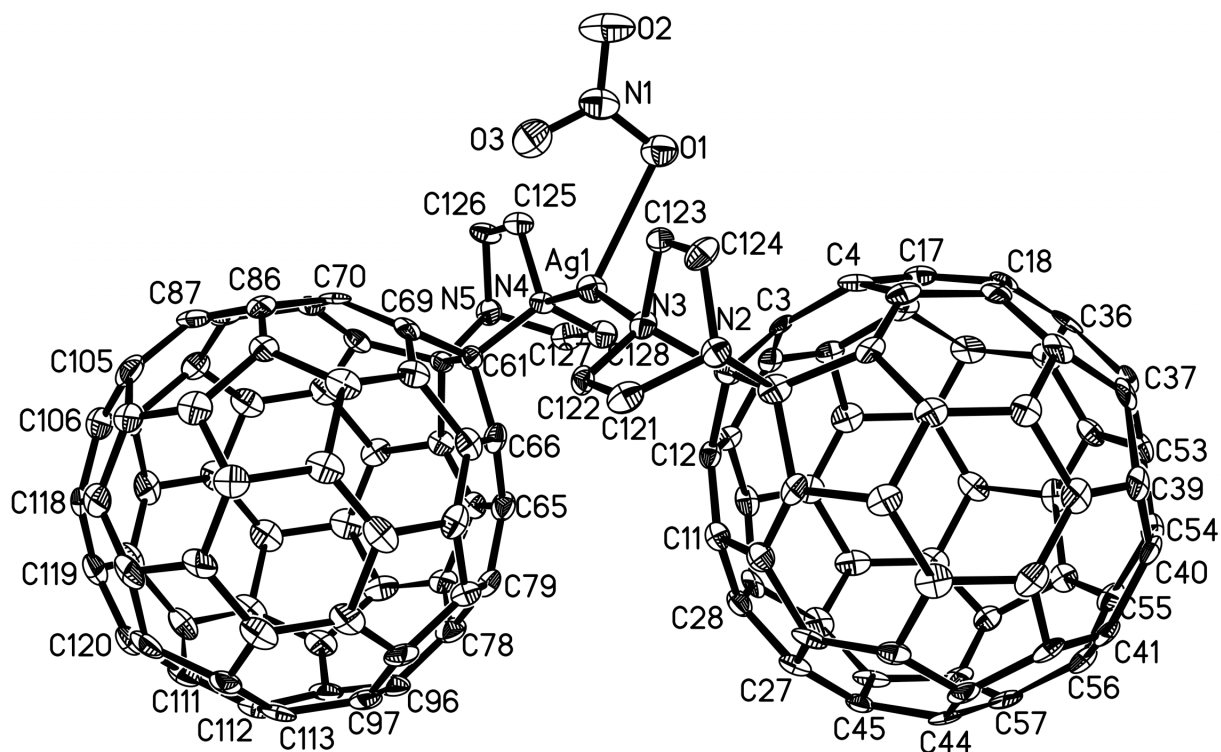

**Figure SI-3.** Numbering for [C<sub>60</sub>(N(CH<sub>2</sub>CH<sub>2</sub>)<sub>2</sub>N)]<sub>2</sub>Ag(NO<sub>3</sub>) • 0.5CH<sub>3</sub>OH • CH<sub>2</sub>Cl<sub>2</sub> with 50 % thermal contours.

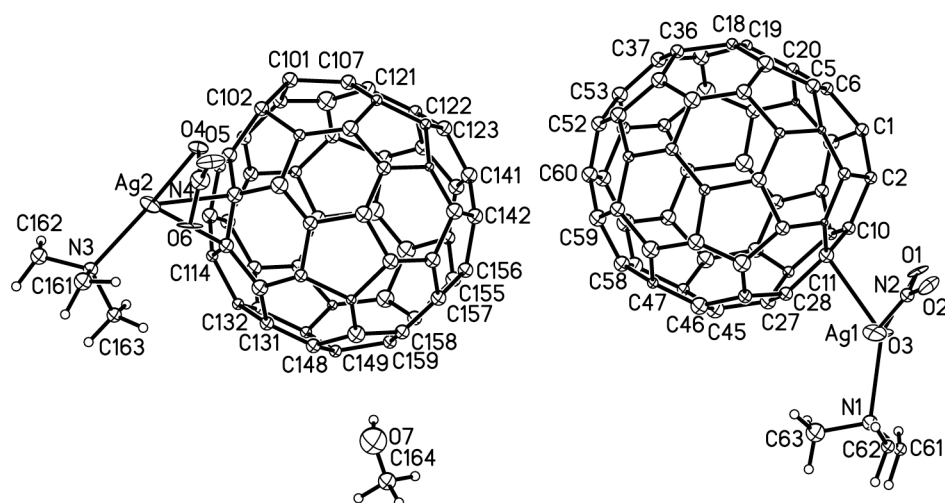

**Figure SI-4.** Numbering for {[C<sub>60</sub>(CH<sub>2</sub>N(CH<sub>3</sub>)CH<sub>2</sub>)]Ag(NO<sub>3</sub>)} • 0.25CH<sub>3</sub>OH with 50 % thermal contours.

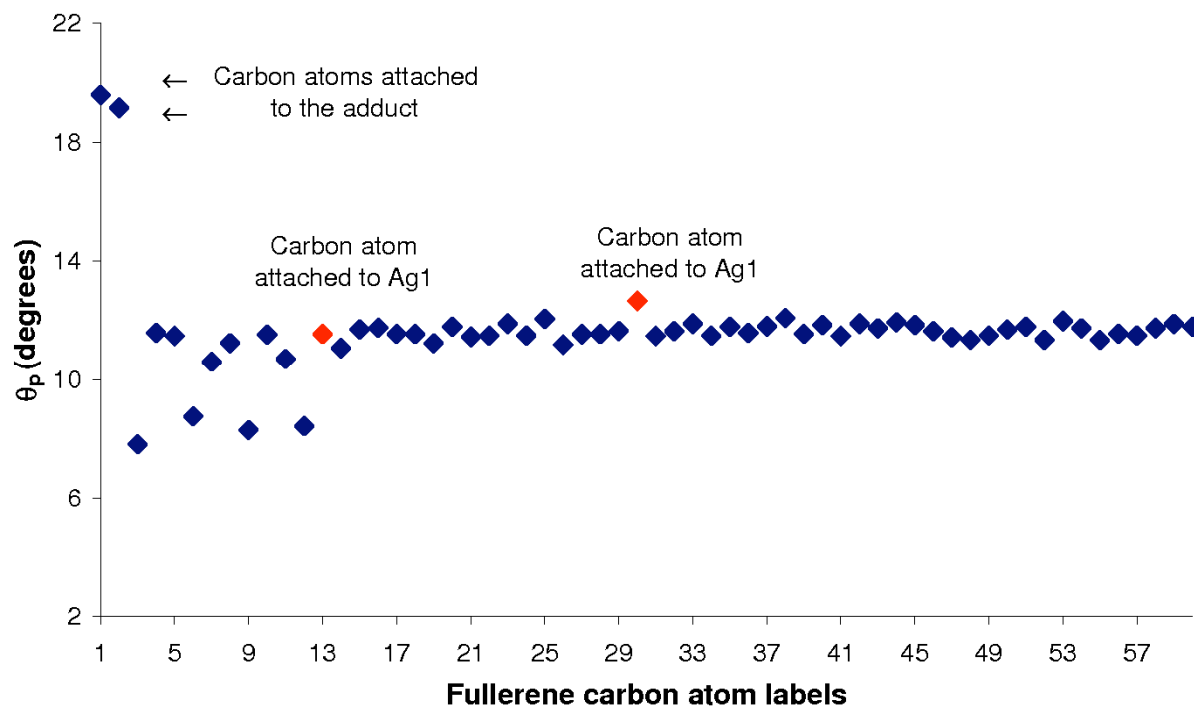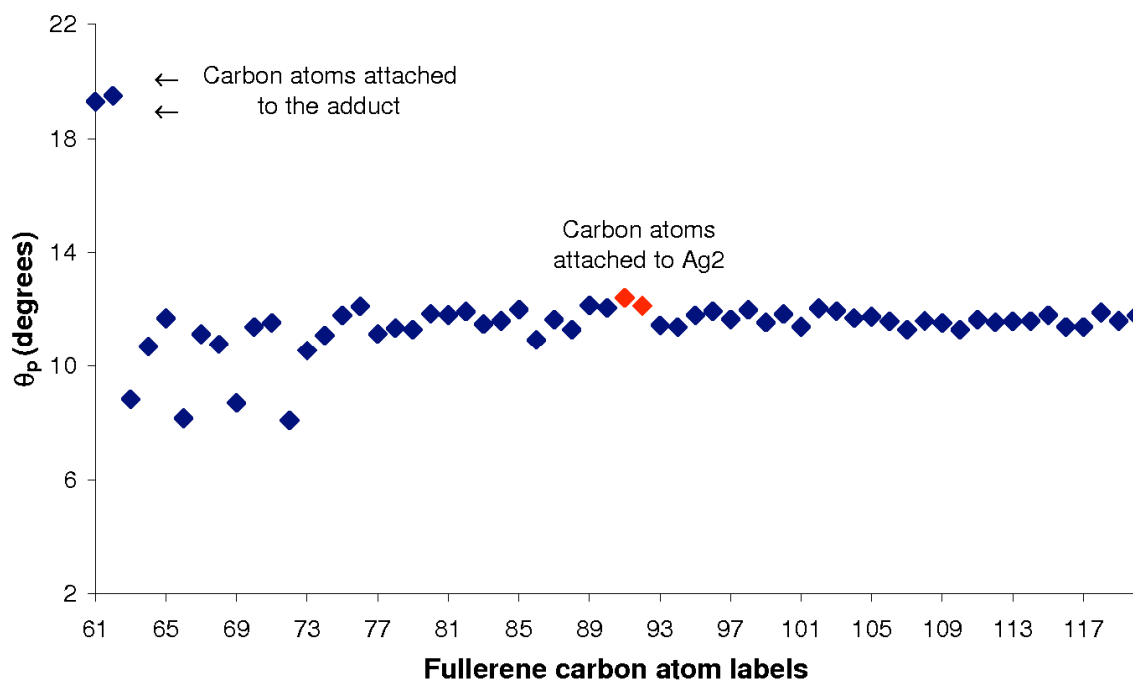

**Figure SI-5.** Pyramidalization angles for fullerene carbon atoms in

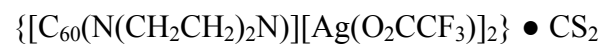

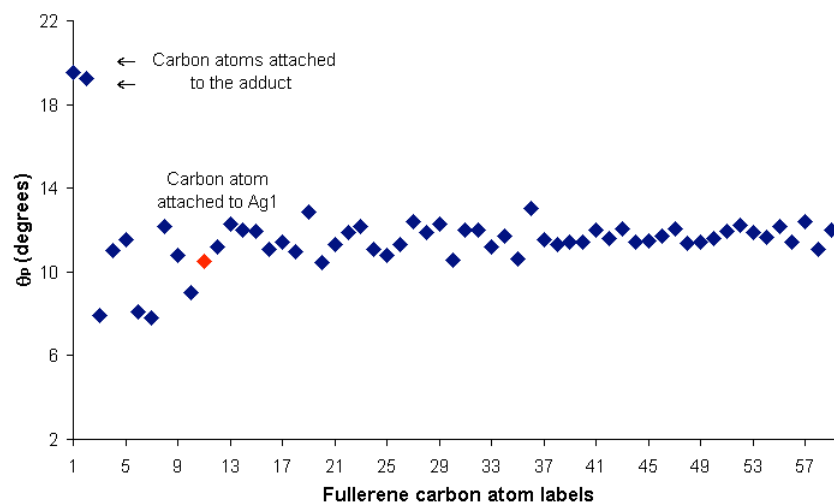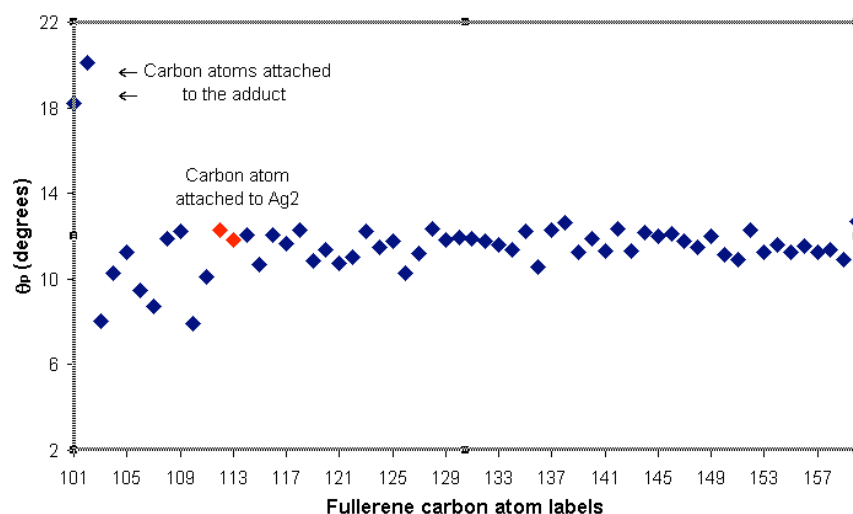

**Figure SI-6.** Pyramidalization angles for fullerene carbon atoms in  $\{[C_{60}(CH_2N(CH_3)CH_2)]Ag(NO_3)\} \bullet 0.25CH_3OH$ .
